# Supplementary material for: Kaempferol induces hepatocellular carcinoma cell death via endoplasmic reticulum stress-CHOP-autophagy signaling pathway
Source: Oncotarget. 2017 Jul 12;8(47):82207–16. doi: 10.18632/oncotarget.19200 (PMC5669883; doi:10.18632/oncotarget.19200)
Supplement: Supplementary file 1 [file oncotarget-08-82207-s001.pdf]

# Kaempferol induces hepatocellular carcinoma cell death via endoplasmic reticulum stress-CHOP-autophagy signaling pathway

## SUPPLEMENTARY MATERIALS

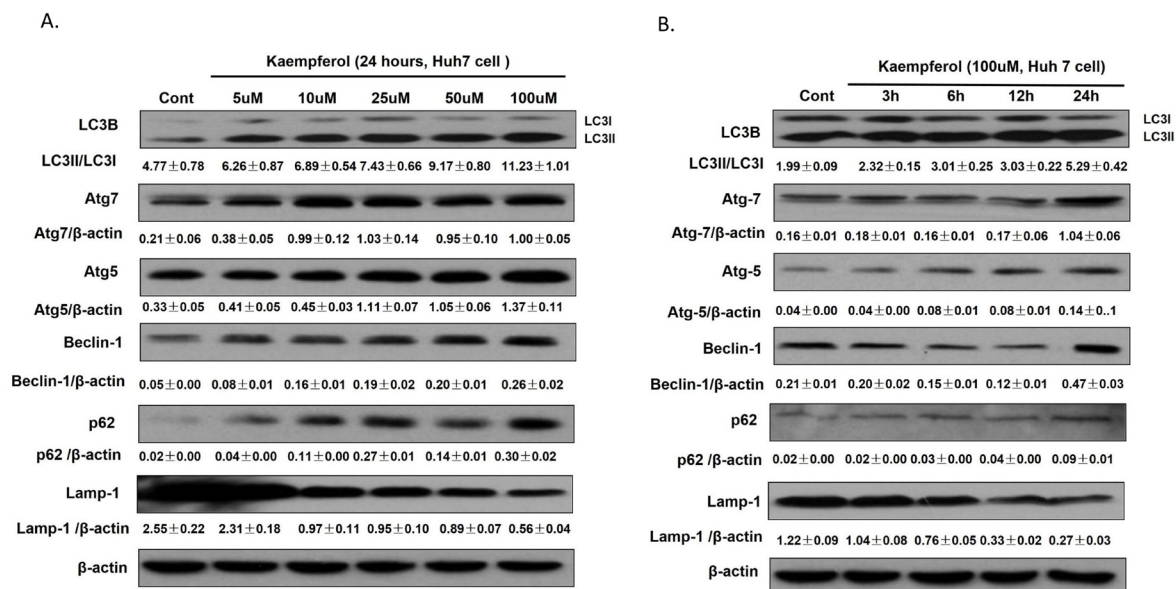

**Supplementary Figure 1: Dose- and time-dependent effects of kaempferol on protein of autophagy-related genes in Huh 7 cells.** Data are expressed as mean ± SD of at least three independent experiments. **(A)** For dose-dependent effects, Huh 7 cells were treated in the presence or absence of different concentrations of kaempferol for 24 h. The protein expression levels of Atg5, Atg7, Beclin1, Lamp1, p62, LC3B and β-actin were measured by western blot. Data are expressed as the mean ± SD of at least three independent experiments. **(B)** For time-dependent effects, Huh 7 cells were exposed to 100 μM kaempferol for different time periods. The protein expression levels of Atg5, Atg7, Beclin1, Lamp1, p62, LC3B and β-actin were measured by western blot. Data are expressed as the mean ± SD of at least three independent experiments.

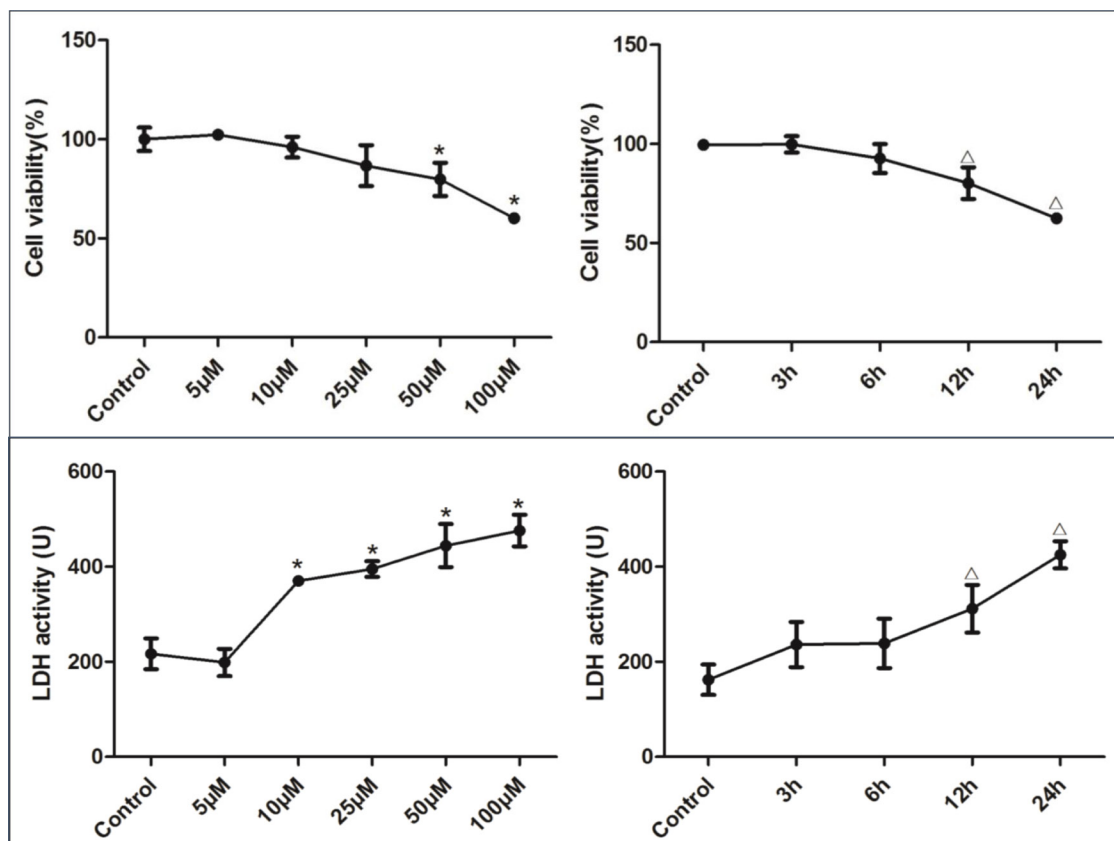

**Supplementary Figure 2: Dose- and time-dependent effects of kaempferol on HepG2 cells.** Data are expressed as the mean  $\pm$  SD of at least three independent experiments. HepG2 cells were treated with 5, 10, 25, 50 and 100  $\mu$ M kaempferol for 24 h, and Hep G2 cells were treated with 100  $\mu$ M kaempferol for 0, 3, 6, 12 and 24 h. All data are expressed as mean  $\pm$  SD of at least three independent experiments. Cell viability was evaluated using MTT assay and cell death was evaluated by measuring LDH activity in the supernatant.

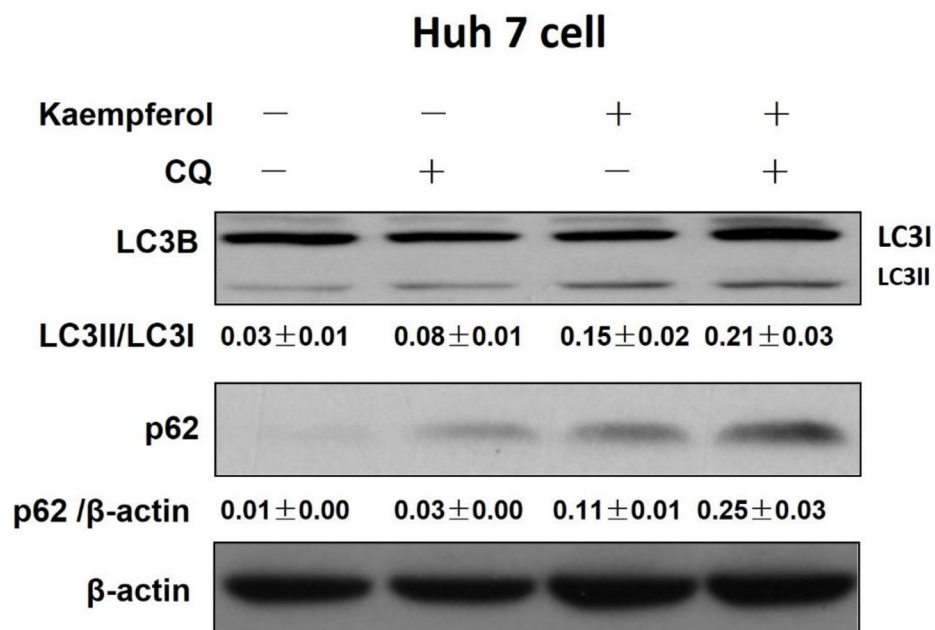

**Supplementary Figure 3: Kaempferol treatment inhibits autophagic flux in the Huh7 cells.** Data are expressed as the mean ± SD of at least three independent experiments. Huh 7 were treated with 100 μM kaempferol in the absence or presence of CQ (10 μM) for 24 hours. Western blot showing the LC3BII/I ratio and p62 degradation. β-actin is shown as a loading control.

## Huh 7 cell

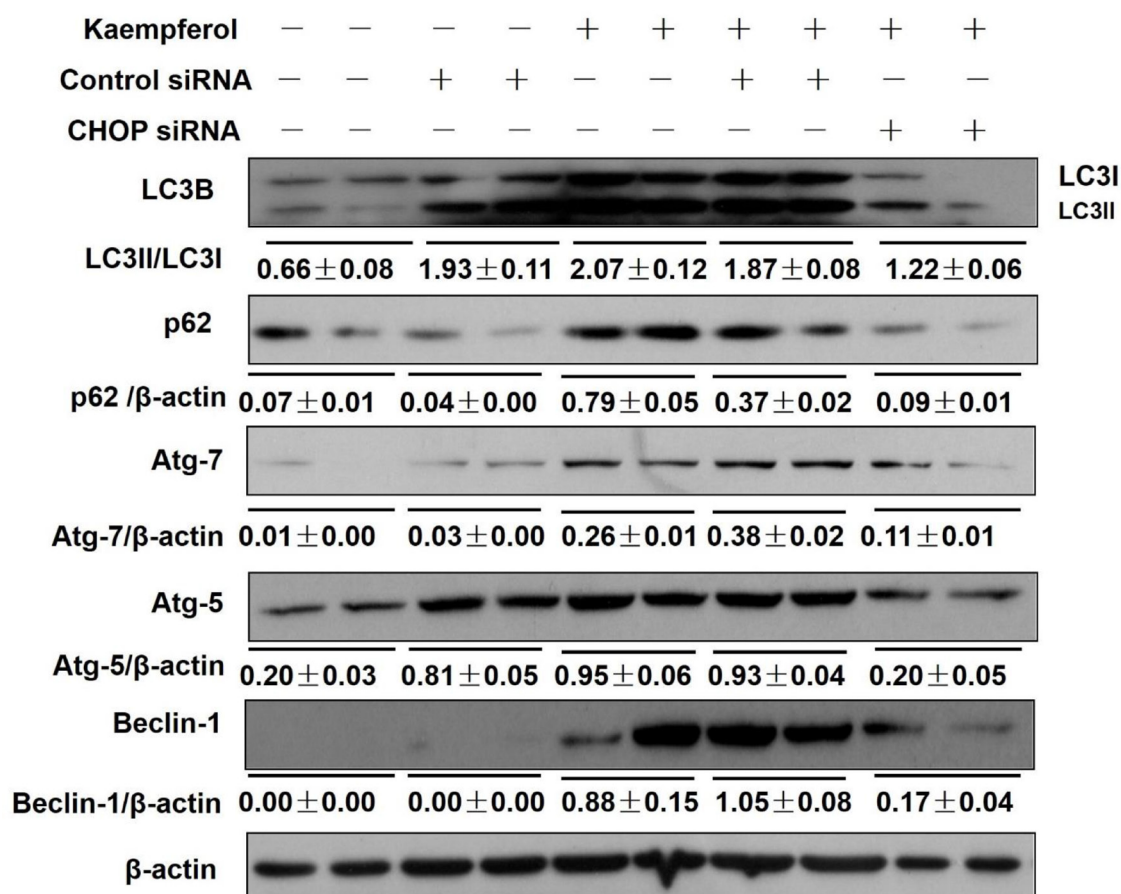

**Supplementary Figure 4: Knockdown of CHOP with siRNA remits kaempferol-induced autophagy in Huh 7 cells.** Data are expressed as the mean ± SD of at least three independent experiments. The protein expression levels of Atg5, Atg7, Beclin1, LC3B, p62 and β-actin were determined by western blot and quantified by densitometry.
